# Supplementary material
Source: MDPI journal article supplement (https://www.mdpi.com/1424-8247/15/5/591)

## Supplementary materials

### ***Mangifera indica* ‘Namdokmai’ prevents neuronal cells from amyloid peptide toxicity and inhibits BACE-1 activities in a *Drosophila* model of Alzheimer's amyloidosis**

**Piya Temviriyankul<sup>1</sup>, Suwapat Kittibunchakul<sup>1</sup>, Piyapat Trisonthi<sup>2</sup>, Thanit Kunkeaw<sup>1</sup>, Woorawee Inthachai<sup>1</sup>, Dalad Siriwan<sup>2\*,†</sup> and Uthaiwan Suttisansanee<sup>1\*,†</sup>**

1 Food and Nutrition Academic and Research Cluster, Institute of Nutrition, Mahidol University, Salaya, Phuttamonthon, Nakhon Pathom 73170, Thailand; piya.tem@mahidol.ac.th (P.T.); suwapat.kit@mahidol.ac.th (S.K.); thanitmu7@yahoo.com (T.K.); woorawee.int@mahidol.ac.th (W.I.)

2 Institute of Food Research and Product Development, Kasetsart University, Chatuchak, Bangkok 10900, Thailand; piyapat.tr@ku.th (P.Tr); dalad.s@ku.th (D.S.)

\* Correspondence: dalad.s@ku.th (D.S.); uthaiwan.sut@mahidol.ac.th (U.S.)

† These authors contributed equally to this work.

## Supplementary Table S1:

The validation parameters including retention time, linearity (linear range, linear regression, and correlation coefficient ( $R^2$ )), limit of detection (LOD), limit of quantification (LOQ), percentage of relative standard deviation (%RSD), and percentage of recovery (%recovery) in selective reaction monitoring (SRM) mode of 24 authentic standards of phenolics using liquid chromatography–electrospray ionization–tandem mass spectrometry (LC-ESI-MS/MS).

| Compounds | Standards                 | Retention time (min) | Linear range ( $\mu\text{g/mL}$ ) | Linear regression equation | Correlation coefficient ( $R^2$ ) | LOD ( $\mu\text{g/mL}$ ) | LOQ ( $\mu\text{g/mL}$ ) | %RSD (Inter-day) | %Recovery                      |                                   |                                 |
|-----------|---------------------------|----------------------|-----------------------------------|----------------------------|-----------------------------------|--------------------------|--------------------------|------------------|--------------------------------|-----------------------------------|---------------------------------|
|           |                           |                      |                                   |                            |                                   |                          |                          |                  | Low level ( $\mu\text{g/mL}$ ) | Medium level ( $\mu\text{g/mL}$ ) | High level ( $\mu\text{g/mL}$ ) |
| 1         | Epigallocatechin gallate  | 0.440                | 0.125–40                          | $y = 8533x + 1053.4$       | 0.9985                            | 0.067                    | 0.230                    | 0.023            | 91.84                          | 85.36                             | 91.37                           |
| 2         | Gallic acid               | 0.564                | 0.195–25                          | $y = 3323.1x - 2100.4$     | 0.9984                            | 0.04                     | 0.14                     | 0.01             | 113.05                         | 118.57                            | 109.12                          |
| 3         | 3,4-Dihydroxybenzoic acid | 0.803                | 0.195–25                          | $y = 11490x - 10877$       | 0.9935                            | 0.010                    | 0.034                    | 0.003            | 90.59                          | 85.75                             | 89.75                           |
| 4         | Chlorogenic acid          | 0.922                | 0.3125–40                         | $y = 8377.5x - 3623.5$     | 0.9934                            | 0.017                    | 0.055                    | 0.006            | 91.94                          | 87.50                             | 95.02                           |
| 5         | 4-Hydroxybenic acid       | 1.160                | 0.3125–40                         | $y = 2482.6x - 3998.4$     | 0.9917                            | 0.027                    | 0.090                    | 0.009            | 109.67                         | 103.60                            | 101.28                          |
| 6         | Caffeic acid              | 1.400                | 0.3125–40                         | $y = 12328x - 19725$       | 0.9918                            | 0.010                    | 0.035                    | 0.003            | 105.36                         | 93.98                             | 87.41                           |
| 7         | Syringic acid             | 1.539                | 3.125–100                         | $y = 68.091x + 230.43$     | 0.9955                            | 0.582                    | 1.939                    | 0.194            | 116.35                         | 97.42                             | 94.91                           |
| 8         | Vanillic acid             | 1.630                | 2.5–100                           | $y = 213.67x - 975.72$     | 0.9900                            | 0.15                     | 0.48                     | 0.05             | 99.86                          | 101.76                            | 100.12                          |
| 9         | <i>p</i> -Coumaric acid   | 2.452                | 0.3125–40                         | $y = 8532.4x - 13559$      | 0.9910                            | 0.013                    | 0.042                    | 0.004            | 88.22                          | 81.36                             | 98.05                           |
| 10        | Rutin                     | 2.737                | 0.009–1.25                        | $y = 49729x - 33.064$      | 0.9999                            | 0.001                    | 0.005                    | 0.0005           | 94.63                          | 114.00                            | 108.73                          |
| 11        | Sinapic acid              | 2.772                | 0.39–25                           | $y = 1592.6x - 832.22$     | 0.9977                            | 0.026                    | 0.086                    | 0.009            | 81.34                          | 92.16                             | 84.22                           |
| 12        | Ferulic acid              | 2.851                | 1.56–100                          | $y = 559.03x - 1819.2$     | 0.9947                            | 0.155                    | 0.518                    | 0.052            | 91.51                          | 89.24                             | 93.10                           |
| 13        | Hesperidin                | 3.410                | 0.25–40                           | $y = 838.63x - 242.2$      | 0.9986                            | 0.07                     | 0.22                     | 0.02             | 100.43                         | 104.06                            | 108.60                          |
| 14        | Myricetin                 | 3.431                | 1.25–40                           | $y = 303.47x - 601.81$     | 0.9976                            | 0.261                    | 0.871                    | 0.087            | 113.07                         | 81.77                             | 91.12                           |
| 15        | Rosmarinic acid           | 3.528                | 0.3125–40                         | $y = 4322.4x - 3744.1$     | 0.9956                            | 0.07                     | 0.25                     | 0.02             | 92.45                          | 106.35                            | 99.62                           |
| 16        | Luteolin                  | 4.158                | 0.195–12.5                        | $y = 8381.9x - 5000.7$     | 0.9945                            | 0.015                    | 0.050                    | 0.0005           | 84.21                          | 96.21                             | 107.09                          |
| 17        | Quercetin                 | 4.185                | 0.05–12.5                         | $y = 2934x + 917.17$       | 0.9937                            | 0.05                     | 0.18                     | 0.02             | 83.36                          | 115.06                            | 95.74                           |
| 18        | Cinnamic acid             | 4.522                | 0.039–10                          | $y = 6631.9x - 866.59$     | 0.9964                            | 0.049                    | 0.163                    | 0.016            | 101.94                         | 98.84                             | 95.85                           |
| 19        | Apigenin                  | 4.689                | 0.34–11                           | $y = 1790.7x - 287.7$      | 0.9997                            | 0.127                    | 0.424                    | 0.042            | 88.84                          | 106.89                            | 114.79                          |
| 20        | Genistein                 | 4.693                | 0.625–40                          | $y = 1247.2x - 1747.1$     | 0.9977                            | 0.049                    | 0.163                    | 0.016            | 95.33                          | 101.49                            | 11633                           |
| 21        | Naringenin                | 4.705                | 0.0008–5                          | $y = 16755x + 443.03$      | 0.9932                            | 0.003                    | 0.011                    | 0.001            | 117.92                         | 96.26                             | 111.08                          |
| 22        | Kaempferol                | 4.790                | 0.25–10                           | $y = 1006.8x - 346.28$     | 0.9905                            | 0.122                    | 0.406                    | 0.041            | 92.35                          | 107.69                            | 102.17                          |
| 23        | Isorhamnetin              | 4.878                | 0.0098–2.5                        | $y = 12698x + 586.16$      | 0.9945                            | 0.016                    | 0.052                    | 0.005            | 113.57                         | 105.88                            | 111.14                          |
| 24        | Galangin                  | 6.146                | 0.3125–40                         | $y = 5012.1x - 9354.7$     | 0.9879                            | 0.010                    | 0.035                    | 0.003            | 84.01                          | 112.92                            | 115.80                          |

**Note:** These data were from Sirichai et al., 2022 [23]. A linear relationship in the calibration plots of all standards presented a correlation coefficients ( $R^2$ ), which was higher than 0.99. The detection limits to quantify phenolics were indicated as LOD and LOQ. The repeatability of peak areas within the same day was present as %RSD. The range of 80–120% recovery percentage was within acceptable limits. Thus, this LC-ESI-MS/MS analysis with SRM mode was suitable and reliable to quantify phenolics in the extracts.

## Supplementary Table S2:

Fragment ions (ion mass, parent ions, selective reaction monitoring (SRM) transition and collision energy) and radio frequencies (RF-lens) of 24 authentic standards of phenolics using liquid chromatography–electrospray ionization–tandem mass spectrometry (LC-ESI-MS/MS).

| Compounds | Standards                 | Ion mass | Parent ions<br>( <i>m/z</i> ) | Selective reaction monitoring (SRM) transitions ( <i>m/z</i> ) and<br>collision energy (V) | Radio frequencies<br>(RF-lens) (V) |
|-----------|---------------------------|----------|-------------------------------|--------------------------------------------------------------------------------------------|------------------------------------|
| 1         | Epigallocatechin gallate  | [M–H]    | 457.175                       | 305.155 (16.84 V), 168.97 (17.59 V), 125.042 (40.30 V)                                     | 204                                |
| 2         | Gallic acid               | [M–H]    | 169.05                        | 124.988 (14.56 V), 96.917 (18.77 V), 79.185 (22.94 V)                                      | 147                                |
| 3         | 3,4-Dihydroxybenzoic acid | [M–H]    | 152.95                        | 109.113 (14.35 V), 81.042 (20.50 V), 91.042 (24.59 V)                                      | 128                                |
| 4         | Chlorogenic acid          | [M–H]    | 353.075                       | 179.042 (14.06 V), 191.000 (16.54 V), 85.095 (39.96 V)                                     | 148                                |
| 5         | 4-Hydroxybenic acid       | [M–H]    | 137.05                        | 92.970 (14.86 V), 65.000 (29.39 V), 75.000 (31.96 V)                                       | 110                                |
| 6         | Caffeic acid              | [M–H]    | 179.038                       | 135.054 (15.07 V), 107.071 (22.57 V), 85.042 (31.96 V)                                     | 151                                |
| 7         | Syringic acid             | [M–H]    | 197.138                       | 182.185 (13.72 V), 167.113 (19.24 V), 123.095 (22.31 V)                                    | 130                                |
| 8         | Vanillic acid             | [M–H]    | 167.000                       | 123.042 (11.66 V), 151.97 (14.59 V), 108.042 (18.65 V)                                     | 114                                |
| 9         | <i>p</i> -Coumaric acid   | [M+H]    | 165.05                        | 147.054 (11.70 V), 119.113 (19.36 V), 91.125 (25.89 V)                                     | 90                                 |
| 10        | Rutin                     | [M+H]    | 611.20                        | 303.13 (20.80), 465.20 (12.71V)                                                            | 198                                |
| 11        | Sinapic acid              | [M–H]    | 223.25                        | 208.125 (13.51 V), 164.024 (15.78 V), 192.970 (22.65 V)                                    | 141                                |
| 12        | Ferulic acid              | [M–H]    | 192.95                        | 149.125 (11.28 V), 177.970 (13.05 V), 134.042 (16.50 V)                                    | 124                                |
| 13        | Hesperidin                | [M–H]    | 609.30                        | 301.179 (24.50 V), 325.179 (27.83 V), 286.125 (41.60 V)                                    | 299                                |
| 14        | Myricetin                 | [M–H]    | 317.088                       | 178.970 (19.53 V), 150.988 (24.50 V), 137.113 (26.86 V)                                    | 245                                |
| 15        | Rosmarinic acid           | [M–H]    | 359.20                        | 197.000 (15.70 V), 161.113 (17.38 V), 133.054 (37.81 V)                                    | 175                                |
| 16        | Luteolin                  | [M–H]    | 285.138                       | 197.000 (15.70 V), 161.113 (17.38 V), 133.054 (37.81 V)                                    | 241                                |
| 17        | Quercetin                 | [M–H]    | 301.200                       | 178.976 (18.18 V), 273.125 (19.45 V), 151.042 (21.39 V)                                    | 237                                |
| 18        | Cinnamic acid             | [M–H]    | 147.00                        | 103.00 (11.23V), 77.083 (23.07)                                                            | 107                                |
| 19        | Apigenin                  | [M–H]    | 269.075                       | 116.863 (34.28 V), 149.071 (25.13 V), 151.131 (25.05 V)                                    | 244                                |
| 20        | Genistein                 | [M–H]    | 269.138                       | 224.054 (25.60 V), 159.054 (29.26 V), 132.929 (30.95 V)                                    | 239                                |
| 21        | Naringenin                | [M+H]    | 272.938                       | 146.97 (21.01 V), 153.054 (24.42 V), 119.000 (31.28 V)                                     | 160                                |
| 22        | Kaempferol                | [M–H]    | 285.150                       | 184.911 (25.85 V), 239.113 (27.03 V), 186.988 (28.17 V)                                    | 260                                |
| 23        | Isorhamnetin              | [M–H]    | 315.088                       | 300.000 (21.30 V), 150.970 (29.14 V), 271.054 (30.57 V)                                    | 233                                |
| 24        | Galangin                  | [M+H]    | 271.088                       | 165.042 (28.80 V), 197.125 (31.75 V), 153.113 (32.42 V)                                    | 248                                |

**Note:** These data were from Sirichai et al., 2022 [23].

### Supplementary Table S3:

Parameters (mass spectral transition, retention time and area under the curve) for liquid chromatography–electrospray ionization tandem mass spectrometry (LC–ESI-MS/MS) of fruit samples.

| Fruits                              | Standard     | MS transition   |                 | Retention time (min) | Area under the curve |
|-------------------------------------|--------------|-----------------|-----------------|----------------------|----------------------|
|                                     |              | Transition 1    | Transition 2    |                      |                      |
| <i>Mangifera indica</i> 'Kaew'      | Gallic acid  | 169.05 / 124.99 | 169.05 / 79.18  | 0.546-0.556          | 158046.00-151473.00  |
|                                     | Quercetin    | 301.20 / 151.04 | 301.20 / 178.98 | 4.135-4.151          | 907.00-1087.00       |
| <i>Mangifera indica</i> 'Namdokmai' | Gallic acid  | 169.05 / 124.99 | 169.05 / 79.18  | 0.546-0.556          | 2163.00-2352.00      |
|                                     | Quercetin    | 301.20 / 151.04 | 301.20 / 178.98 | 4.135-4.151          | 12088.00-13880.00    |
|                                     | Naringenin   | 272.94 / 153.05 | 272.94 / 146.97 | 4.660-4.672          | 745.00-795.00        |
|                                     | Kaempferol   | 285.15 / 239.11 | 285.15 / 186.99 | 4.740-4.750          | 106.00-118.00        |
|                                     | Isorhamnetin | 315.09 / 300.00 | 315.09 / 150.97 | 4.820-4.832          | 1446.00-1680.00      |
| <i>Psidium guajava</i> 'Kimju'      | Gallic acid  | 169.05 / 124.99 | 169.05 / 79.18  | 0.546-0.556          | 45407.00-46080.00    |
|                                     | Quercetin    | 301.20 / 151.04 | 301.20 / 178.98 | 4.139-4.151          | 1354.00-1593.00      |

**Note:** The identifications of phenolics were based on the matching of 2 MS transitions (transition 1 and transition 2) from 2-3 MS transitions of authentic standards (as in Supplementary Table S2).

## Supplementary Table S4:

Information on neurotoxicity and neuroprotective effect of the selected fruit extracts (*M. indica* 'Namdokmai', *M. indica* 'Keaw' and *P. guajava* 'Kimju')

| Fruit extract                       | Incubating time (h) | Extract Concentration (µg/mL) |              |              |                |                |
|-------------------------------------|---------------------|-------------------------------|--------------|--------------|----------------|----------------|
|                                     |                     | 0                             | 25           | 50           | 100            | 150            |
| <i>Mangifera indica</i> 'Kaew'      | 24                  | 95.56 ± 4.35                  | 97.49 ± 1.92 | 93.37 ± 2.75 | 95.43 ± 3.79   | 91.53 ± 3.32   |
|                                     | 48                  | 98.04 ± 2.19                  | 95.56 ± 4.60 | 98.05 ± 2.30 | 91.35 ± 1.60 * | 86.06 ± 1.75 * |
|                                     | 72                  | 101.60 ± 5.55                 | 94.60 ± 2.88 | 94.18 ± 3.60 | 82.02 ± 1.78 * | 78.66 ± 2.88 * |
| <i>Mangifera indica</i> 'Namdokmai' | 24                  | 98.22 ± 0.94                  | 93.56 ± 2.46 | 94.35 ± 2.35 | 95.43 ± 3.79   | 95.42 ± 3.52   |
|                                     | 48                  | 98.04 ± 2.19                  | 98.83 ± 3.82 | 94.78 ± 3.62 | 96.75 ± 3.15   | 94.01 ± 1.89   |
|                                     | 72                  | 99.25 ± 2.72                  | 95.09 ± 2.23 | 92.92 ± 3.59 | 84.78 ± 3.98 * | 79.93 ± 2.14 * |
| <i>Psidium guajava</i> 'Kimju'      | 24                  | 97.87 ± 4.42                  | 98.49 ± 1.65 | 96.67 ± 4.23 | 95.76 ± 4.35   | 91.35 ± 3.79   |
|                                     | 48                  | 98.97 ± 1.63                  | 98.87 ± 3.52 | 98.10 ± 1.89 | 98.19 ± 1.76   | 86.05 ± 2.97 * |
|                                     | 72                  | 101.00 ± 3.47                 | 99.34 ± 2.71 | 92.38 ± 3.84 | 87.48 ± 2.44 * | 73.64 ± 2.32 * |

\* Significance at  $p < 0.05$  compared with untreated cells using two-way analysis of variance (ANOVA) followed by Tukey's multiple comparisons test.

## Supplementary Table S5:

Information on neuroprotective effect of the selected fruit extracts (*M. indica* 'Namdokmai', *M. indica* 'Keaw' and *P. guajava* 'Kimju')

| Conditions                                          | Extract                  | % Cell viability           |                                 |                              | % Lactate dehydrogenase (LDH) release |                                 |                              | % Relative light unit (RLU) |                                 |                              |
|-----------------------------------------------------|--------------------------|----------------------------|---------------------------------|------------------------------|---------------------------------------|---------------------------------|------------------------------|-----------------------------|---------------------------------|------------------------------|
|                                                     | concentration<br>(µg/mL) | <i>M. indica</i><br>'Kaew' | <i>M. indica</i><br>'Namdokmai' | <i>P. guajava</i><br>'Kimju' | <i>M. indica</i><br>'Kaew'            | <i>M. indica</i><br>'Namdokmai' | <i>P. guajava</i><br>'Kimju' | <i>M. indica</i><br>'Kaew'  | <i>M. indica</i><br>'Namdokmai' | <i>P. guajava</i><br>'Kimju' |
| Untreated for H <sub>2</sub> O <sub>2</sub> inducer |                          |                            | 98.73 ± 0.93                    |                              |                                       | 13.10 ± 1.45                    |                              |                             | 98.92 ± 2.50                    |                              |
| H <sub>2</sub> O <sub>2</sub> -<br>treated          | 0                        |                            | 56.82 ± 1.97 #                  |                              |                                       | 54.83 ± 3.19 #                  |                              |                             | 42.30 ± 2.66 #                  |                              |
|                                                     | 25                       | 62.72 ± 2.12 *             | 66.39 ± 1.78 **                 | 60.68 ± 1.54 *               | 52.09 ± 2.28                          | 46.48 ± 1.36 ***                | 53.41 ± 3.82                 | 46.64 ± 1.60 *              | 56.90 ± 1.44 *                  | 50.83 ± 3.19 *               |
|                                                     | 50                       | 64.76 ± 1.33 ***           | 69.27 ± 2.22 ***                | 65.64 ± 1.55 ***             | 49.78 ± 1.69 *                        | 41.16 ± 1.66 ***                | 47.97 ± 1.18 ***             | 54.67 ± 2.11 ***            | 62.64 ± 2.82 ***                | 59.52 ± 1.31 ***             |
|                                                     | 100                      | 65.88 ± 1.77 ***           | 73.43 ± 1.90 ***                | 66.63 ± 1.70 ***             | 44.93 ± 1.69 ***                      | 34.27 ± 3.57 ***                | 45.39 ± 1.30 ***             | 64.50 ± 1.83 ***            | 73.57 ± 1.59 ***                | 68.68 ± 1.09 ***             |
|                                                     | 150                      | 72.57 ± 1.91 ***           | 81.90 ± 2.20 ***                | 75.54 ± 1.49 ***             | 36.18 ± 2.18 ***                      | 15.56 ± 0.67 ***                | 35.85 ± 2.28 ***             | 71.98 ± 1.67 ***            | 86.47 ± 2.18 ***                | 76.61 ± 2.27 ***             |
| Untreated for Aβ <sub>1-42</sub> inducer            |                          |                            | 99.50 ± 1.91                    |                              |                                       | 13.22 ± 1.39                    |                              |                             | 97.90 ± 2.20                    |                              |
| Aβ <sub>1-42</sub> -<br>treated                     | 0                        |                            | 50.92 ± 3.68 #                  |                              |                                       | 52.83 ± 2.35 #                  |                              |                             | 49.00 ± 3.41 #                  |                              |
|                                                     | 25                       | 51.37 ± 2.41               | 46.48 ± 1.36                    | 53.92 ± 2.54                 | 51.37 ± 2.41                          | 46.48 ± 1.36 **                 | 53.92 ± 2.54                 | 53.23 ± 3.97                | 57.20 ± 1.61 **                 | 51.65 ± 5.30                 |
|                                                     | 50                       | 57.43 ± 3.44 **            | 59.47 ± 3.19 **                 | 60.09 ± 4.42 ***             | 47.28 ± 2.54 *                        | 41.16 ± 1.66 ***                | 45.82 ± 2.07 ***             | 59.33 ± 1.49 ***            | 63.28 ± 2.86 ***                | 60.95 ± 1.83 ***             |
|                                                     | 100                      | 63.26 ± 1.05 ***           | 71.94 ± 3.35 ***                | 69.30 ± 1.07 ***             | 39.55 ± 2.22 ***                      | 27.83 ± 1.66 ***                | 37.83 ± 2.07 ***             | 64.09 ± 2.05 ***            | 72.35 ± 2.68 ***                | 66.91 ± 1.74 ***             |
|                                                     | 150                      | 70.89 ± 2.30 ***           | 82.62 ± 3.37 ***                | 76.28 ± 2.40 ***             | 37.19 ± 1.84 ***                      | 25.00 ± 3.16 ***                | 33.48 ± 3.80 ***             | 71.98 ± 1.67 ***            | 82.48 ± 2.70 ***                | 75.33 ± 2.54 ***             |

# Significance at  $p < 0.05$  compared to the untreated control, \* significance at  $p < 0.05$ , \*\* significance at  $p = 0.01$  and \*\*\* significance at  $p = 0.001$  compared with either H<sub>2</sub>O<sub>2</sub> or Aβ<sub>1-42</sub>-treated cells using one-way analysis of variance (ANOVA) followed by Tukey's multiple comparisons test.

Supplementary Table S6:

Images of fruit samples including *Ananas comosus* 'Phulae', *Ananas comosus* 'Pattavia', *Carica papaya* 'Khaekdum', *Carica papaya* 'Khaeknuan', *Durio zibethinus* 'Monthong', *Durio zibethinus* 'Chanee', *Psidium guajava* 'Kimju', *Psidium guajava* 'Keenok', *Mangifera indica* 'Kaew', and *Mangifera indica* 'Namdokmai'.

| Fruits                  | Physical appearance                                                                 |                                                                                      |
|-------------------------|-------------------------------------------------------------------------------------|--------------------------------------------------------------------------------------|
| <i>Ananas comosus</i>   |    |    |
|                         | 'Phulae'                                                                            | 'Pattavia'                                                                           |
| <i>Carica papaya</i>    |  |  |
|                         | 'Khaekdum'                                                                          | 'Khaeknuan'                                                                          |
| <i>Durio zibethinus</i> |  |  |
|                         | 'Monthong'                                                                          | 'Chanee'                                                                             |

Supplementary Table S6 (Cont.):

Images of fruit samples including *Ananas comosus* ‘Phulae’, *Ananas comosus* ‘Pattavia’, *Carica papaya* ‘Khaekdum’, *Carica papaya* ‘Khaeknuan’, *Durio zibethinus* ‘Monthong’, *Durio zibethinus* ‘Chanee’, *Psidium guajava* ‘Kimju’, *Psidium guajava* ‘Keenok’, *Mangifera indica* ‘Kaew’, and *Mangifera indica* ‘Namdokmai’.

| Fruits                  | Physical appearance                                                                 |                                                                                      |
|-------------------------|-------------------------------------------------------------------------------------|--------------------------------------------------------------------------------------|
| <i>Psidium guajava</i>  |   |   |
|                         | ‘Kimju’                                                                             | ‘Keenok’                                                                             |
| <i>Mangifera indica</i> |  |  |
|                         | ‘Kaew’                                                                              | ‘Namdokmai’                                                                          |



## Supplementary Figure S1:

The liquid chromatography–electrospray ionization tandem mass spectrometry (LC–ESI-MS/MS) chromatograms of 24 phenolic standards.

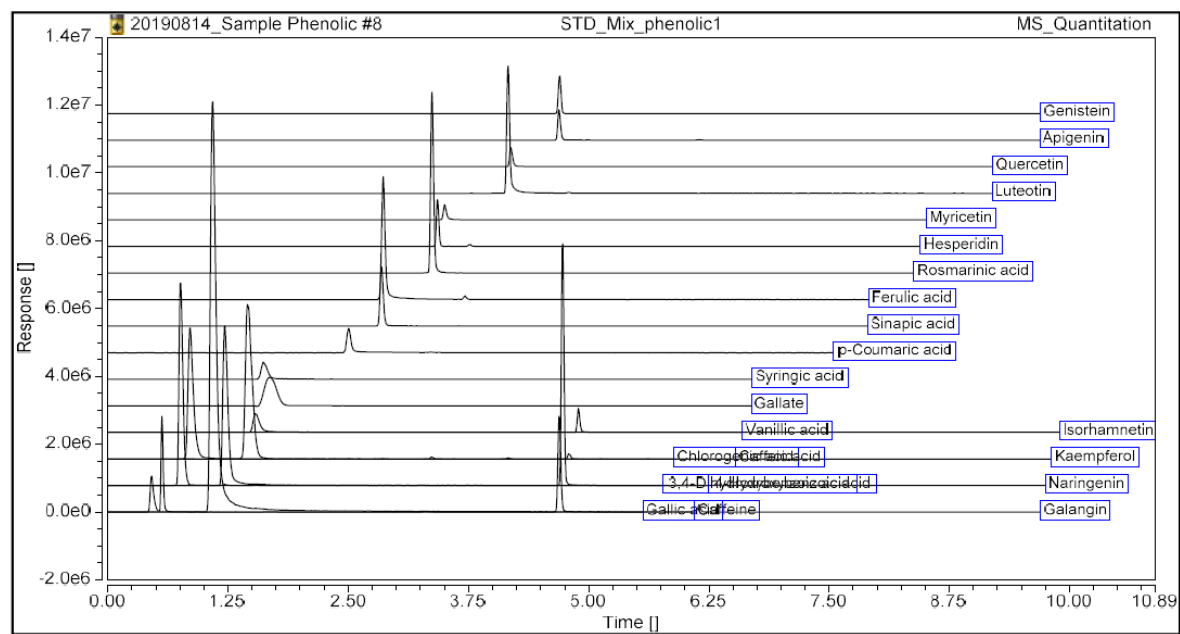

## Supplementary Figure S2:

The liquid chromatography–electrospray ionization tandem mass spectrometry (LC–ESI-MS/MS) chromatograms of the selected fruit samples including (a) *Mangifera indica* ‘Kaew’, (b) *Mangifera indica* ‘Namdokmai’, and (c) *Psidium guajava* ‘Kimju’.

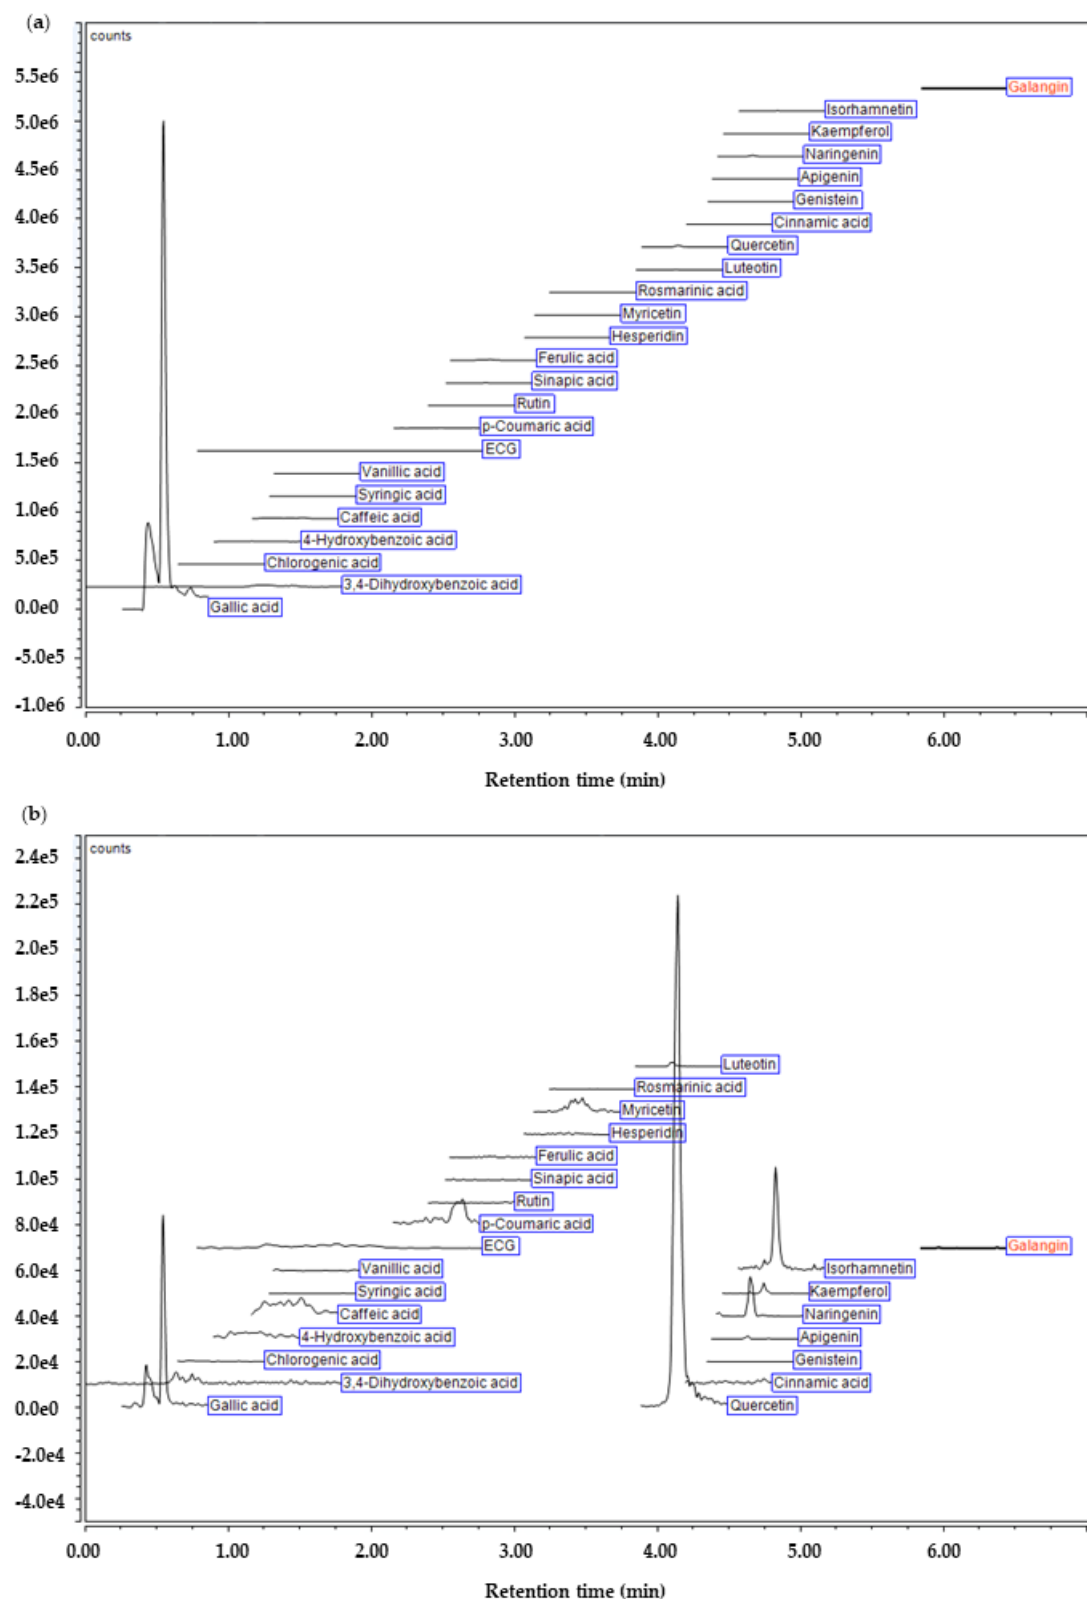

### Supplementary Figure S2 (cont.):

The liquid chromatography–electrospray ionization tandem mass spectrometry (LC–ESI–MS/MS) chromatograms of the selected fruit samples including (a) *Mangifera indica* ‘Kaew’, (b) *Mangifera indica* ‘Namdokmai’, and (c) *Psidium guajava* ‘Kimju’.

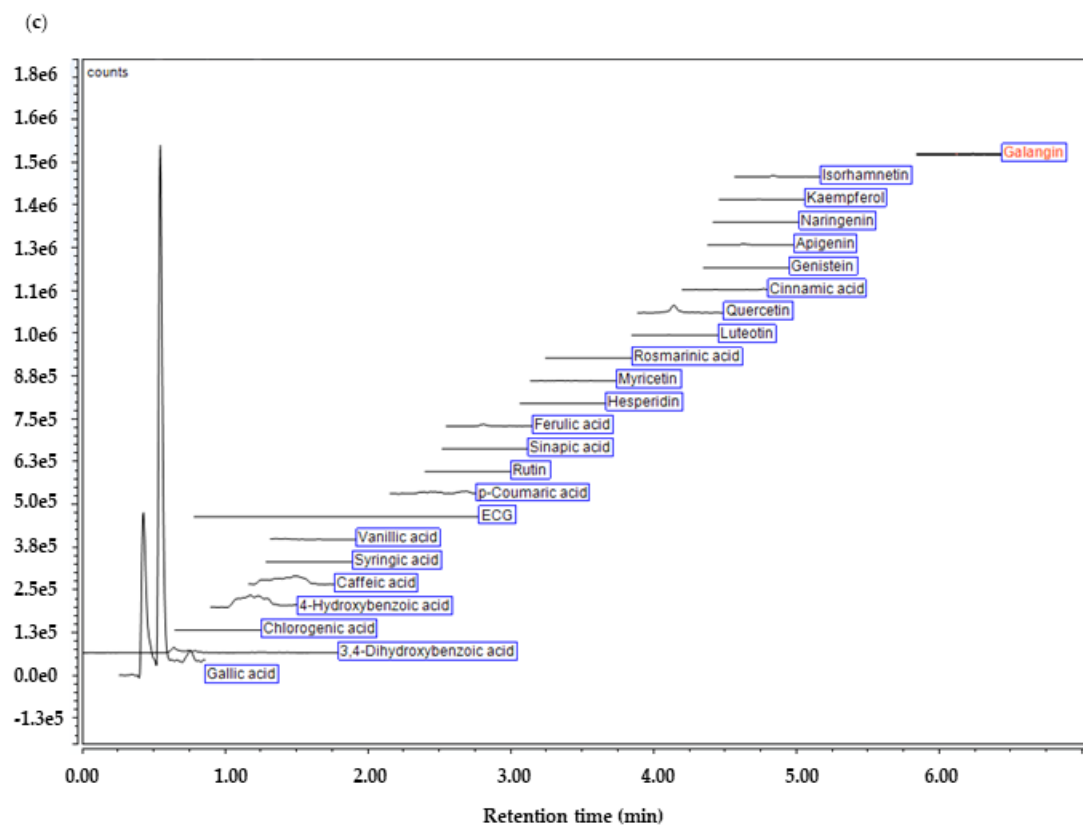

Supplement: s1 [file s1]
